# Supplementary material for: Multiply charged ion profiles in the UHPLC-HRMS analysis of palytoxin analogues from Ostreopsis cf. ovata blooms
Source: PubMed Central journal article supplement — Anal Methods. 2023 Feb 8;15(10):1355–64. doi: 10.1039/d2ay02019j (PMC10633106; doi:10.1039/d2ay02019j), 2023-02-08
Supplement: AY-015-D2AY02019J-s001.pdf [file AY-015-D2AY02019J-s001.pdf]

## † Electronic Supporting Information (ESI)

### Multiple charged ions profile in the UHPLC-HRMS analysis of palytoxin analogues from *Ostreopsis cf. ovata* blooms

Noemí Inmaculada Medina-Pérez,<sup>a,b</sup> Francisco Javier Santos,<sup>a,c</sup> Elisa Berdalet<sup>b</sup> and Encarnación Moyano<sup>\*a,c</sup>

<sup>a</sup> Department of Chemical Engineering and Analytical Chemistry, University of Barcelona, Barcelona, Spain

<sup>b</sup> Department of Marine Biology and Oceanography, Institute of Marine Sciences (ICM-CSIC), Barcelona, Spain

<sup>c</sup> Water Research Institute (IdRA), University of Barcelona, Barcelona, Spain

\*encarna.moyano@ub.edu

**Table S1** Summary of the instrumental systems, electrospray ionization sources and quantification methods used in the comparative of the analytical quantification of the PLTX analogues.

| <b>System</b>                          | <b>System I: Q-Exactive Orbitrap</b>    |                                           |                                         |                                           | <b>System II: LTQ-Orbitrap</b>          |                                           |
|----------------------------------------|-----------------------------------------|-------------------------------------------|-----------------------------------------|-------------------------------------------|-----------------------------------------|-------------------------------------------|
| <b>Electrospray Ionization Sources</b> | <b>Method 1:</b><br>HESI-II at 350 °C   |                                           | <b>Method 2:</b><br>HESI-II at 25 °C    |                                           | <b>Method 3:</b><br>ESI source at 25 °C |                                           |
| <b>Quantification method</b>           | <b>QM-A:</b><br>the 2 most intense ions | <b>QM-B:</b><br>group of 13 ions selected | <b>QM-A:</b><br>the 2 most intense ions | <b>QM-B:</b><br>group of 13 ions selected | <b>QM-A:</b><br>the 2 most intense ions | <b>QM-B:</b><br>group of 13 ions selected |

**Table S2** Molecular formulae of PLTX analogues, the ion exact mass ( $m/z$ ) and the monoisotopic mass of the most intense isotope ( $m/z$ ) selected for quantitative analysis by UHPLC-HRMS.

|                                        |               | Iso-PLTX                                                         | OVTX-a                                                           | OVTX-b                                                           | OVTX-c                                                           | OVTX-d                                                           | OVTX-e                                                           | OVTX-f                                                           | OVTX-g                                                           |
|----------------------------------------|---------------|------------------------------------------------------------------|------------------------------------------------------------------|------------------------------------------------------------------|------------------------------------------------------------------|------------------------------------------------------------------|------------------------------------------------------------------|------------------------------------------------------------------|------------------------------------------------------------------|
| Formula                                |               | C <sub>129</sub> H <sub>223</sub> N <sub>3</sub> O <sub>54</sub> | C <sub>129</sub> H <sub>223</sub> N <sub>3</sub> O <sub>52</sub> | C <sub>131</sub> H <sub>227</sub> N <sub>3</sub> O <sub>53</sub> | C <sub>131</sub> H <sub>227</sub> N <sub>3</sub> O <sub>54</sub> | C <sub>129</sub> H <sub>223</sub> N <sub>3</sub> O <sub>53</sub> | C <sub>129</sub> H <sub>223</sub> N <sub>3</sub> O <sub>53</sub> | C <sub>131</sub> H <sub>227</sub> N <sub>3</sub> O <sub>52</sub> | C <sub>129</sub> H <sub>223</sub> N <sub>3</sub> O <sub>51</sub> |
| [M+3H-4H <sub>2</sub> O] <sup>3+</sup> | Exact mass    | 869.8197                                                         | 859.1564                                                         | 873.8318                                                         | 879.1635                                                         | 864.4881                                                         | 864.4881                                                         | 868.5002                                                         | 853.8248                                                         |
|                                        | Selected ion* | 870.1542                                                         | 859.4909                                                         | 874.1663                                                         | 897.4979                                                         | 864.8225                                                         | 864.8225                                                         | 868.8347                                                         | 854.1593                                                         |
| [M+3H-3H <sub>2</sub> O] <sup>3+</sup> | Exact mass    | 875.8232                                                         | 865.1600                                                         | 879.8354                                                         | 885.1670                                                         | 870.4916                                                         | 870.4916                                                         | 874.5037                                                         | 859.8283                                                         |
|                                        | Selected ion* | 876.1577                                                         | 865.4944                                                         | 880.1698                                                         | 885.5015                                                         | 870.8261                                                         | 870.8261                                                         | 874.8382                                                         | 860.1628                                                         |
| [M+3H-2H <sub>2</sub> O] <sup>3+</sup> | Exact mass    | 881.8268                                                         | 871.1635                                                         | 885.8389                                                         | 891.1705                                                         | 876.4951                                                         | 876.4951                                                         | 880.5073                                                         | 865.8318                                                         |
|                                        | Selected ion* | 882.1612                                                         | 871.4979                                                         | 886.1733                                                         | 891.5050                                                         | 876.8296                                                         | 876.8296                                                         | 880.8417                                                         | 866.1663                                                         |
| [M+3H-H <sub>2</sub> O] <sup>3+</sup>  | Exact mass    | 887.8303                                                         | 877.1670                                                         | 891.8424                                                         | 897.1741                                                         | 882.4986                                                         | 882.4986                                                         | 886.5108                                                         | 871.8354                                                         |
|                                        | Selected ion* | 888.1647                                                         | 877.5015                                                         | 892.1769                                                         | 897.5085                                                         | 882.8331                                                         | 882.8331                                                         | 886.8452                                                         | 872.1698                                                         |
| [M+H+Mg] <sup>3+</sup>                 | Exact mass    | 901.1569                                                         | 890.4937                                                         | 905.1691                                                         | 910.5007                                                         | 895.8253                                                         | 895.8253                                                         | 899.8374                                                         | 885.1620                                                         |
|                                        | Selected ion* | 901.4914                                                         | 890.8281                                                         | 905.5036                                                         | 910.8352                                                         | 896.1598                                                         | 896.1598                                                         | 900.1719                                                         | 885.4965                                                         |
| [M+H+Ca] <sup>3+</sup>                 | Exact mass    | 906.4828                                                         | 895.8195                                                         | 910.4949                                                         | 915.8266                                                         | 901.1511                                                         | 901.1511                                                         | 905.1633                                                         | 890.4879                                                         |
|                                        | Selected ion* | 906.8172                                                         | 896.1540                                                         | 910.8294                                                         | 916.1610                                                         | 901.4856                                                         | 901.4856                                                         | 905.4977                                                         | 890.8223                                                         |
| [M+H+Fe] <sup>3+</sup>                 | Exact mass    | 911.1418                                                         | 900.4785                                                         | 915.1539                                                         | 920.4856                                                         | 905.8102                                                         | 905.8102                                                         | 909.8223                                                         | 895.1469                                                         |
|                                        | Selected ion* | 912.1414                                                         | 901.4781                                                         | 916.1535                                                         | 921.4851                                                         | 906.8097                                                         | 906.8097                                                         | 910.8219                                                         | 896.1464                                                         |

|                                            |                      |           |           |           |           |           |           |           |           |
|--------------------------------------------|----------------------|-----------|-----------|-----------|-----------|-----------|-----------|-----------|-----------|
| <b>[M+2H-3H<sub>2</sub>O]<sup>2+</sup></b> | <b>Exact mass</b>    | 1313.2312 | 1297.2363 | 1319.2494 | 1327.2469 | 1305.2338 | 1305.2338 | 1311.2520 | 1289.2389 |
|                                            | <b>Selected ion*</b> | 1313.7329 | 1297.7380 | 1319.7511 | 1327.7486 | 1305.7355 | 1305.7355 | 1311.7536 | 1289.7405 |
| <b>[M+2H-2H<sub>2</sub>O]<sup>2+</sup></b> | <b>Exact mass</b>    | 1322.2365 | 1306.2416 | 1328.2547 | 1336.2522 | 1314.2390 | 1314.2390 | 1320.2572 | 1298.2441 |
|                                            | <b>Selected ion*</b> | 1322.7382 | 1306.7433 | 1328.7564 | 1336.7538 | 1314.7407 | 1314.7407 | 1320.7589 | 1298.7458 |
| <b>[M+2H-H<sub>2</sub>O]<sup>2+</sup></b>  | <b>Exact mass</b>    | 1331.2418 | 1315.2469 | 1337.2600 | 1345.2574 | 1323.2443 | 1323.2443 | 1329.2625 | 1307.2494 |
|                                            | <b>Selected ion*</b> | 1331.7435 | 1315.7486 | 1337.7617 | 1345.7591 | 1323.7460 | 1323.7460 | 1329.7642 | 1307.7511 |
| <b>[M+2H]<sup>2+</sup></b>                 | <b>Exact mass</b>    | 1340.2471 | 1324.2522 | 1346.2653 | 1354.2627 | 1332.2496 | 1332.2496 | 1338.2678 | 1316.2547 |
|                                            | <b>Selected ion*</b> | 1340.7488 | 1324.7538 | 1346.7669 | 1354.7644 | 1332.7513 | 1332.7513 | 1338.7695 | 1316.7564 |
| <b>[M+H+Na]<sup>2+</sup></b>               | <b>Exact mass</b>    | 1351.2380 | 1335.2431 | 1357.2562 | 1365.2537 | 1343.2406 | 1343.2406 | 1349.2588 | 1327.2457 |
|                                            | <b>Selected ion*</b> | 1351.7397 | 1335.7448 | 1357.7579 | 1365.7554 | 1343.7423 | 1343.7423 | 1349.7605 | 1327.7474 |
| <b>[M+H+K]<sup>2+</sup></b>                | <b>Exact mass</b>    | 1359.2250 | 1343.2301 | 1365.2432 | 1373.2407 | 1351.2276 | 1351.2276 | 1357.2457 | 1335.2326 |
|                                            | <b>Selected ion*</b> | 1359.7267 | 1343.7318 | 1365.7449 | 1373.7423 | 1351.7292 | 1351.7292 | 1357.7474 | 1335.7343 |

\*Selected ion: monoisotopic mass of the most intense isotope selected for quantitative analysis.

**Table S3** Statistic *p*-values of the paired t-tests to explore the significant differences in the total toxin concentrations as a function of the quantification methods (QM-A or QM-B) and instrumental methods (Method 1, Method 2, or Method 3).

|                      |                       | <i>P</i> -value (one-tail) | <i>P</i> -value (two-tails) |
|----------------------|-----------------------|----------------------------|-----------------------------|
| <b>QM-A</b>          | <b>Method 1 vs. 2</b> | 1.44E-05                   | 2.89E-05                    |
|                      | <b>Method 1 vs. 3</b> | 7.47E-06                   | 1.49E-05                    |
|                      | <b>Method 2 vs. 3</b> | 7.88E-05                   | 1.58E-04                    |
| <b>QM-B</b>          | <b>Method 1 vs. 2</b> | 1.83E-01                   | 3.67E-01                    |
|                      | <b>Method 1 vs. 3</b> | 3.43E-06                   | 6.86E-06                    |
|                      | <b>Method 2 vs. 3</b> | 2.86E-05                   | 5.72E-05                    |
| <b>QM-A vs. QM-B</b> | <b>Method 1</b>       | 4.61E-06                   | 9.23E-06                    |
|                      | <b>Method 2</b>       | 1.08E-04                   | 2.16E-04                    |
|                      | <b>Method 3</b>       | 3.89E-04                   | 7.78E-04                    |

a) Control conditions

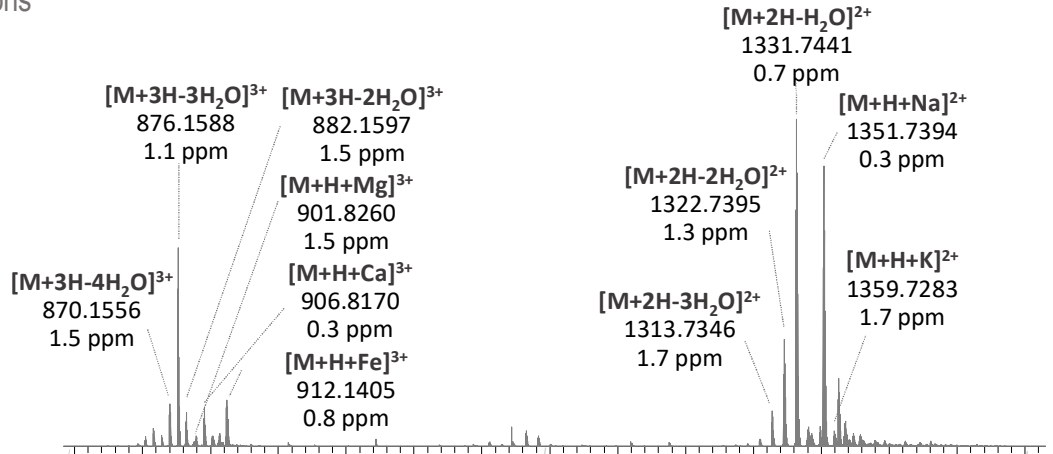

b)  $CaCl_2$  (1 mM)

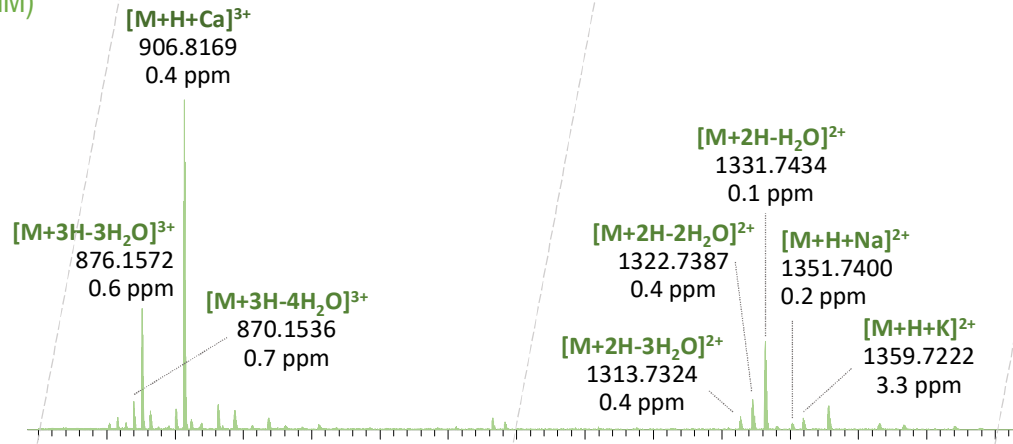

c)  $NaCl$  (3 mM)

NL: 2.4E+05

Relative Abundance (%)

100  
50  
0

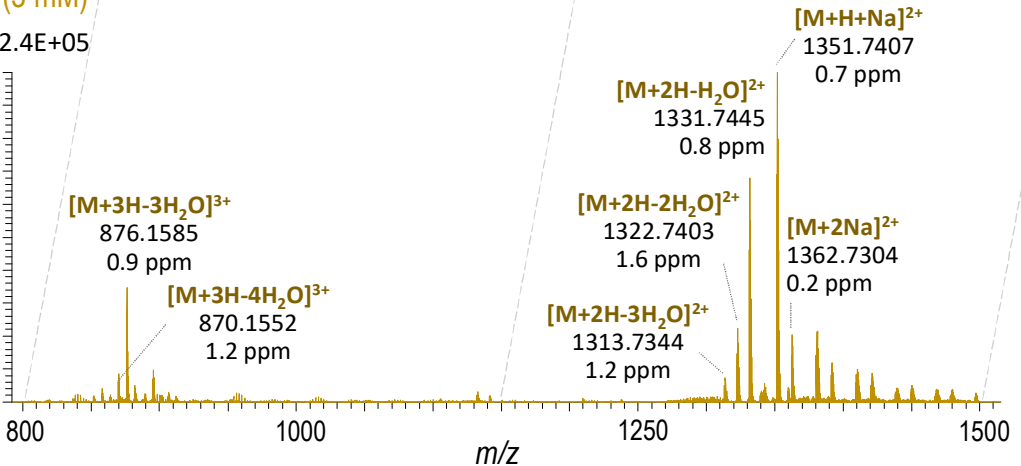

**Fig. S1** HRMS spectra obtained from the UHPLC-HRMS analysis of PLTX standard ( $1 \mu\text{g mL}^{-1}$ ) using the post-column addition of (a) control conditions (b)  $CaCl_2$  (1 mM) and (c)  $NaCl$  (3 mM).

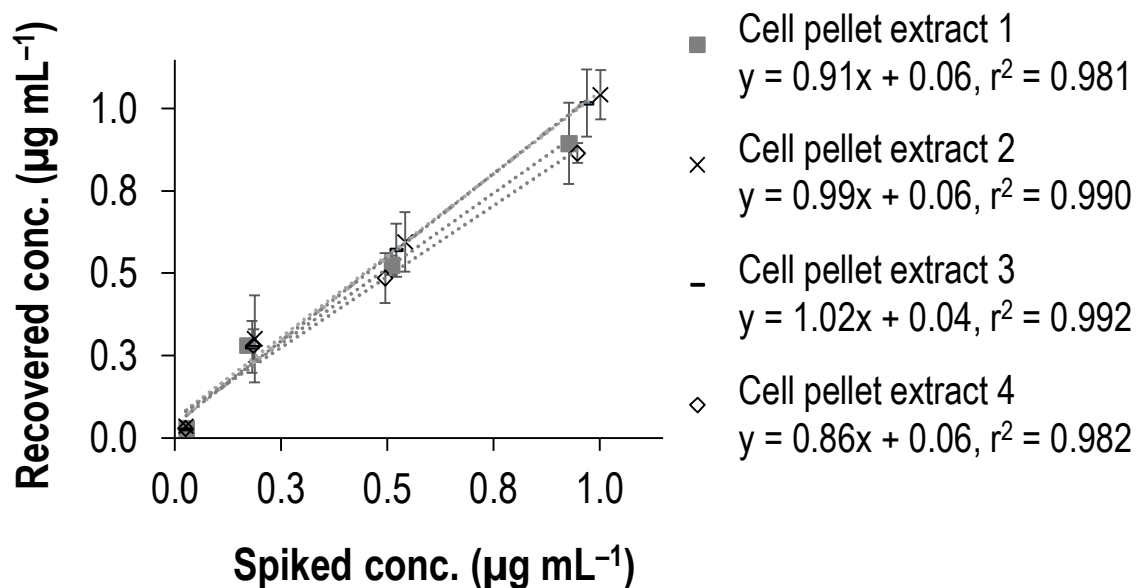

**Fig. S2** Calibrations curves for PLTX standard spiked in cell pellets (matrix-matched standards). The vertical bars indicate the standard deviation for three replicate injections.

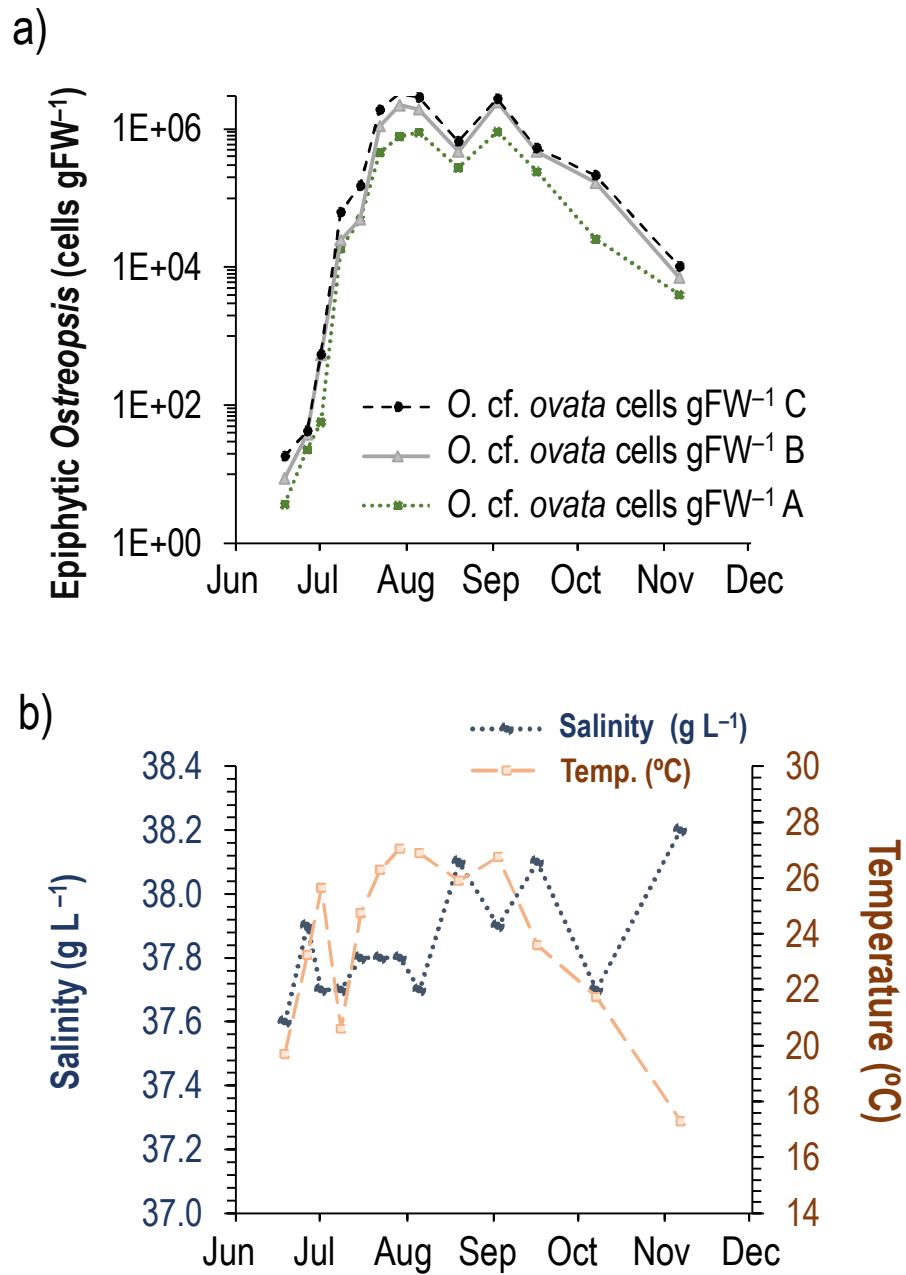

**Fig. S3** (a) *Ostreopsis cf. ovata* epiphytic abundance during the 2019 proliferation; (b) salinity and temperature measured during the *O. cf. ovata* proliferation.
